# Supplementary material for: Core–shell structured carbon dots with up-conversion fluorescence and photo-triggered nitric oxide-releasing properties
Source: Royal Society of Chemistry journal article supplement (doi:10.1039/d3an02034g), 2023-12-23
Supplement: d3an02034g1.pdf [file d3an02034g1.pdf]

## *Supporting Information*

### **Core-shell structured carbon dots with up-conversion fluorescence and photo-triggered nitric oxide-releasing property**

Xiaoyan Wu,<sup>a,1</sup> Meiyang Wang,<sup>a,1</sup> Feng Yu,<sup>b</sup> Hao Cai,<sup>a</sup> Antonio Claudio Tedesco,<sup>b,c</sup> Zijian Li,<sup>a</sup> Hong Bi<sup>a,\*</sup>

<sup>a</sup> School of Materials Science and Engineering, Anhui University, Hefei 230601, China. E-mail: bihong@ahu.edu.cn

<sup>b</sup> School of Chemistry and Chemical Engineering, Anhui University, Hefei 230601, China

<sup>c</sup> Department of Chemistry, Center of Nanotechnology and Tissue Engineering-Photobiology and Photomedicine Research Group, Faculty of Philosophy, Sciences and Letters of Ribeirão Preto, University of São Paulo, Ribeirão Preto, São Paulo 14040-901, Brazil

<sup>1</sup> These two authors contributed equally to this work.

## **1. Experimental**

**1.1 Materials.** All the chemicals used in the processes were commercially available without further purification. Levofloxacin, triton X-100, 5,5-dimethyl-1-pyrroline N-oxide (DMPO), 2,2,6,6-tetramethylpiperidine

(TEMP), and 2-phenyl-4,4,5,5-tetramethylimidazoline-1-oxyl-3-oxide (PTIO) were purchased from Shanghai Aladdin Industrial Corporation. L-Arginine (Arg) was purchased from Sinopharm Chemical Reagent Co., Ltd (Shanghai, China). Phosphate buffer saline (PBS), Dulbecco's modified Eagle's medium (DMEM), Roswell Park Memorial Institute (RPMI) 1640 medium, trypsin, penicillin/streptomycin, and fetal bovine serum (FBS) were purchased from Gibco (Shanghai, China). Regenerated cellulose dialysis bags were purchased from Shanghai Yuanye Biotechnology Co., Ltd. Calcein-AM/PI and commercial probes of the lysosome, mitochondria, endoplasmic reticulum, ROS, and RNS were purchased from Beyotime Biotechnology (Shanghai, China). CCK-8 and AO staining kits were purchased from Beijing Soleibao Technology Co., Ltd. The water used in the experiment is ultrapure, obtained from Kertone Water Treatment Co., Ltd.

**1.2 Instrumentation and Characterization.** The morphology of Arg-CDs was observed by JEM-2100 transmission electron microscope (TEM, JEOL, Tokyo, Japan). The high-resolution transmission electron microscopy (HRTEM) result was obtained by JEOL-F200 transmission electron microscopy (Tokyo, Japan) at 200 kV. Fourier transform infrared (FTIR) spectrum was obtained using a Nexus 870 infrared spectrum spectrometer. X-ray photoelectron spectroscopy (XPS) was measured using an ESCALAB250 system with Al K $\alpha$  radiation (1486.6 eV). Raman

spectrum was recorded using a laser confocal micro-Raman spectroscopy (InVia-Reflex, Renishaw, London, Britain). Powder X-ray diffraction (XRD) was obtained on a PRO diffractometer with Cu K $\alpha$  radiation on X'Pert. The ultraviolet-visible (UV-Vis) spectra were measured using a UV-1800PC spectrophotometer (Shanghai meipuda instrument co., LTD, China). The photoluminescence (PL) emission spectroscopy was measured by Hitachi F-7000 fluorescence spectrophotometer. Absolute quantum yields (QY) were obtained using a HORIBA FLSP920 system in the calibration sphere. The up-conversion fluorescence emission spectrum was measured by using a multi-photon test system (Astrella-1k-SUP, TOPAS-Prime) and femtosecond pulsed laser (fs-laser) (680-1080 nm) as the light source. The Zeta potential results were obtained with a Zeta size analyzer (Nano ZS90, Malvern Instruments Ltd.). The cytotoxicity data were acquired by a microplate reader (CMax Plus, Shanghai Meigu Molecular Devices Co., Ltd., Shanghai). Fluorescence microscopy images were recorded with Olympus IX-51 inverted fluorescence microscope (Olympus, Tokyo, Japan). Confocal laser scanning microscopy (CLSM) was recorded with a laser scanning microscope (Leica SP8 DIVE).

**1.3 Synthesis of carbon dots (Arg-CDs).** The Arg-CDs were prepared by the hydrothermal decomposition of L-Arginine and Levofloxacin. Briefly, the mixture of L-Arginine (0.5 g) and Levofloxacin (0.5 g) was dissolved in 20 mL deionized water and then transferred into 50 mL poly

(tetrafluoroethylene)-lined autoclaves. After heating at 180 °C for 4 h, the solution was allowed to cool to room temperature naturally. The yellow solution was filtered (0.22 μm) and dialyzed in regenerated cellulose dialysis tubing with MWCO 500-1000 for 120 h to remove unreacted L-Arginine and Levofloxacin. Finally, the dialyzed solution was vacuum-dried at -60 °C to collect a powder.

**1.4 Cytotoxicity assay.** Typical CCK-8 assays were performed to detect cell viability. First, HepG2 cells were separately inoculated into 96-well cell culture plates at a density of 8000 cells per well and incubated at 37 °C for 24 h. Then, various concentrations of Arg-CDs (0-300 μg/mL) were added to each well for 24 h to measure the viability of the cells. 10 μL of CCK-8 was added to each well and left for 4 h in the dark. Finally, the optical density (OD) was recorded at 450 nm using an enzyme marker (CMAX PLUS, SpectraMax® Absorbance Reader). The experiments were repeated three times.

**1.5 Hemolysis Assay.** Red blood cells (RBCs) were obtained from the mouse blood. The 500 μL fresh mouse blood was discarded from the supernatant by centrifugation (2000 rpm, 5 min) and resuspended the sediment into 1 mL saline. Repeat the above operation 3-5 times until the supernatant is colorless. The obtained red blood cells were suspended in 1 mL saline for use. Take 50 μL of the above red blood cell suspension and add different concentrations of Arg-CDs in PBS. At the same time, the

negative control group (physiological saline) and positive control group (1% Triton X-100 solution) were set up. After incubation at 37 °C for 2 h, the system was centrifuged at 2000 rpm for 5 min, the supernatant was transferred into a 96-well plate, and their absorbance at 450 nm was measured with a microplate reader.

**1.6 Cell culture and subcellular localization.** HepG2, SY5Y, and HUVEC cells were purchased from the Cell Culture Center of Peking Union Medical College. The cells were cultured in a DMEM medium containing 1% penicillin/streptomycin and 10% FBS in a 37°C, 5% CO<sub>2</sub> incubator.

The cells were seeded in a confocal laser dish at 37 °C overnight, and then the Arg-CDs were added and co-incubated for 6 h. After washing with PBS 3 times, the cells were incubated with commercial organelle probes containing Lyso-Tracker Green, Mito-Tracker Green, and ER-Tracker Green for 30 min. The fluorescence images were obtained on a widefield fluorescence microscope with a 63×oil lens.

**1.7 Detection of the ROS and NO.** The intracellular ROS generation was detected by using the ROS probe DCFH-DA. The intracellular NO generation was detected by using NO probe DAF-FM DA. Briefly, the HepG2 cells were planted in 12-well plates at 37 °C overnight, and then the Arg-CDs were added and co-incubated for 6 h. After 12 min light irradiation (400-500 nm, 100 mW cm<sup>-2</sup>), the cells were stained with DCFH-

DA and DAF-FM DA for 20 min. After washing with PBS 3 times, the cells were observed in an inverted fluorescence microscope at 488 nm or 561 nm excitation wavelength. Griess Reagent from Beyotime Biotechnology (Shanghai, China) was adopted for NO quantitative determination.

**1.8 Live/Dead Cell Staining Assay.** The calcein-AM and propidium iodide (PI) were used to evaluate the live and dead cells. HepG2 cells were seeded in a six-well plate with a density of  $1.0 \times 10^5$  cells per well and incubated with Arg-CDs at the same concentration ( $200 \mu\text{g mL}^{-1}$ ). As for laser irradiation groups, all treatment was similar to that above and irradiated by an LED light for 12 min. After all the treatment, HepG2 cells were stained with calcein-AM ( $2 \mu\text{M}$ ) and PI ( $4 \mu\text{M}$ ) and then analyzed by fluorescence microscopy.

**1.9 AO staining test.** The operation was the same as the calcein-AM/PI test. The cells were stained with AO for 15 min and imaged in a widefield fluorescence microscope with a 63 $\times$  oil lens.

Growth Inhibition Effect of Arg-CDs on MCs. Briefly, 45  $\mu\text{L}$  1% hot agarose solution was added into each well of 96-well plates beforehand. After cooling the agarose solution,  $5 \times 10^4$  cells were planted into the well and incubated at 37 °C overnight to form 3D MCs. A fluorescence microscope observed the cytotoxicity of Arg-CDs to HepG2 MCs. Then, the Arg-CDs were added to treat 3D MCs when the disaster reached 200

$\mu\text{m}$  and accepted 12 min light irradiation (400-500 nm,  $100 \text{ mWcm}^{-2}$ ) daily. The daily morphology of 3D MCs was recorded. The above experiments were repeated three times.

**1.10 Statistical analysis.** Statistical analysis was performed using two-tailed Student's t-tests, and all data were given as mean  $\pm$  standard deviation (SD).

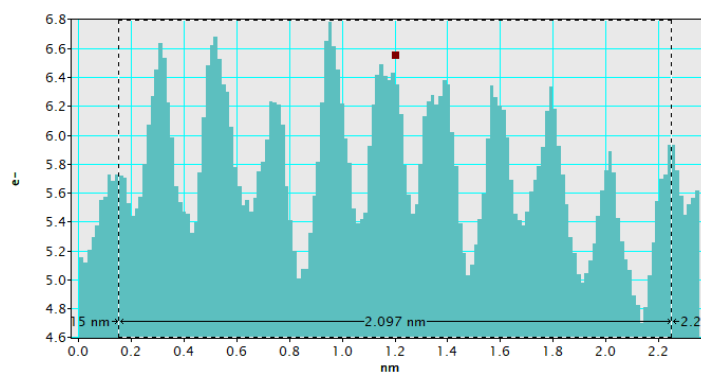

**Fig. S1.** Line profile of diffraction fringes for the Arg-CDs.

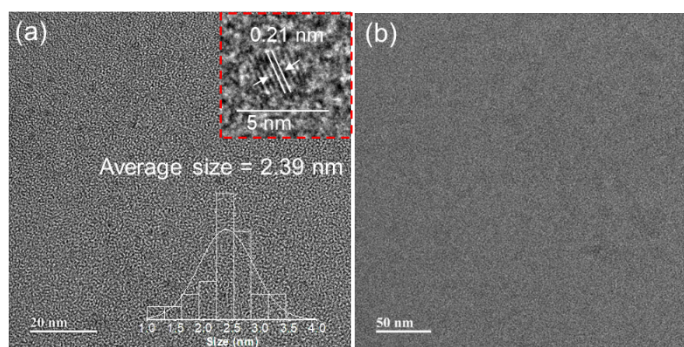

**Fig. S2** (a) TEM image of single precursor levofloxacin-derived (named as N-CDs), the inset shows the high-resolution TEM image of an individual N-CD and size distribution of N-CDs. (b) TEM image of the product synthesized from a single precursor of arginine.

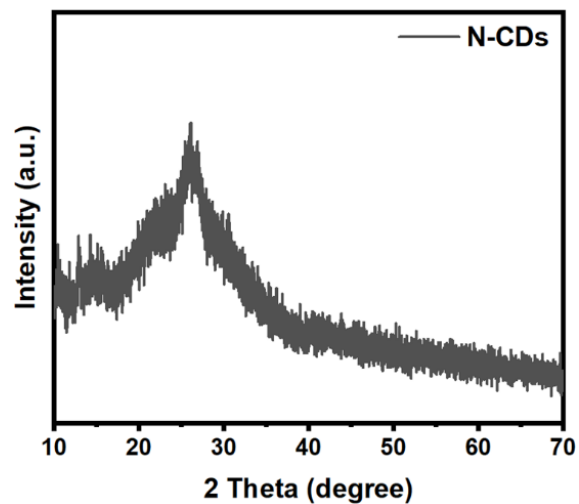

**Fig. S3** XRD pattern of the levofloxacin-derived N-CDs.

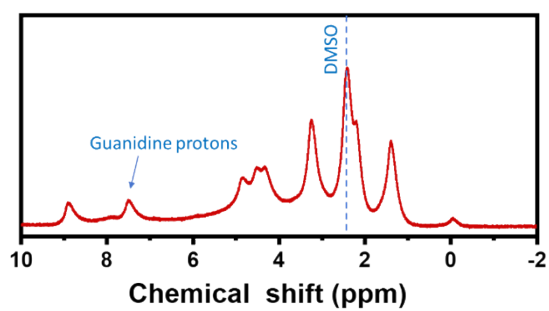

**Fig. S4** <sup>1</sup>H NMR spectrum of the Arg-CDs (10 mg mL<sup>-1</sup> in DMSO-D<sub>6</sub>).

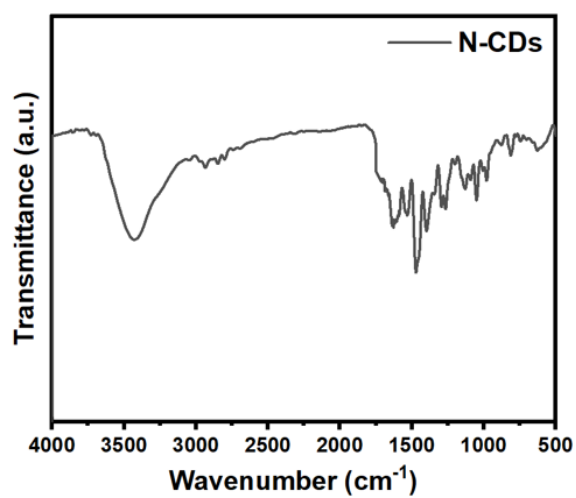

**Fig. S5** FT-IR spectra of the levofloxacin-derived N-CDs.



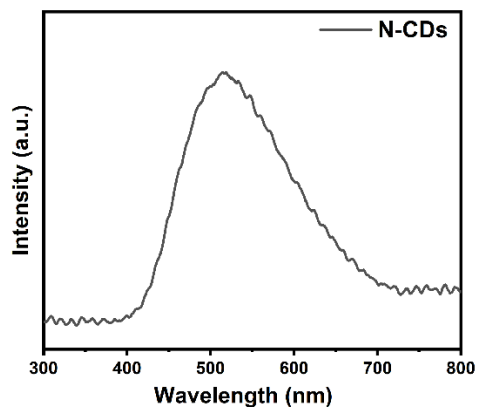

**Fig. S6** PL spectra of N-CDs under excitation of 740 nm laser.

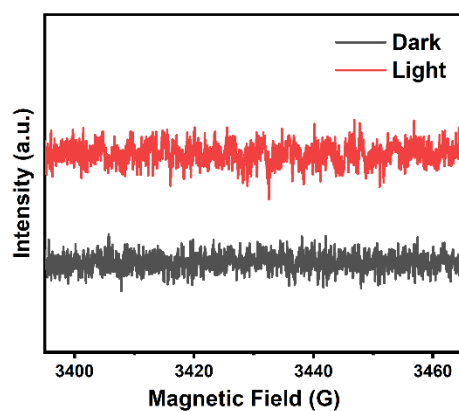

**Fig. S7** EPR spectrums of DMPO trapping the  $\bullet\text{OH}$  produced by Arg-CDs under LED irradiation (400-500 nm,  $100 \text{ mW cm}^{-2}$ , 2 min).

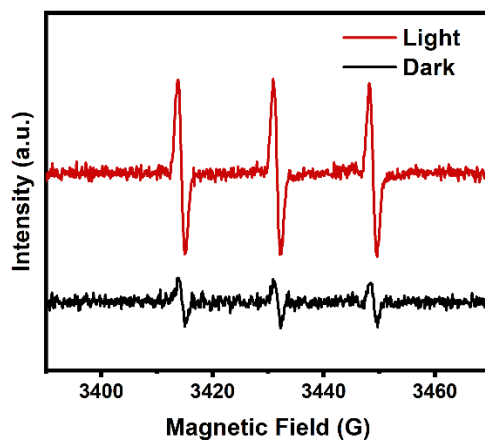

**Fig. S8** EPR spectra of N-CDs that TEMP trapping the  $^1\text{O}_2$ .

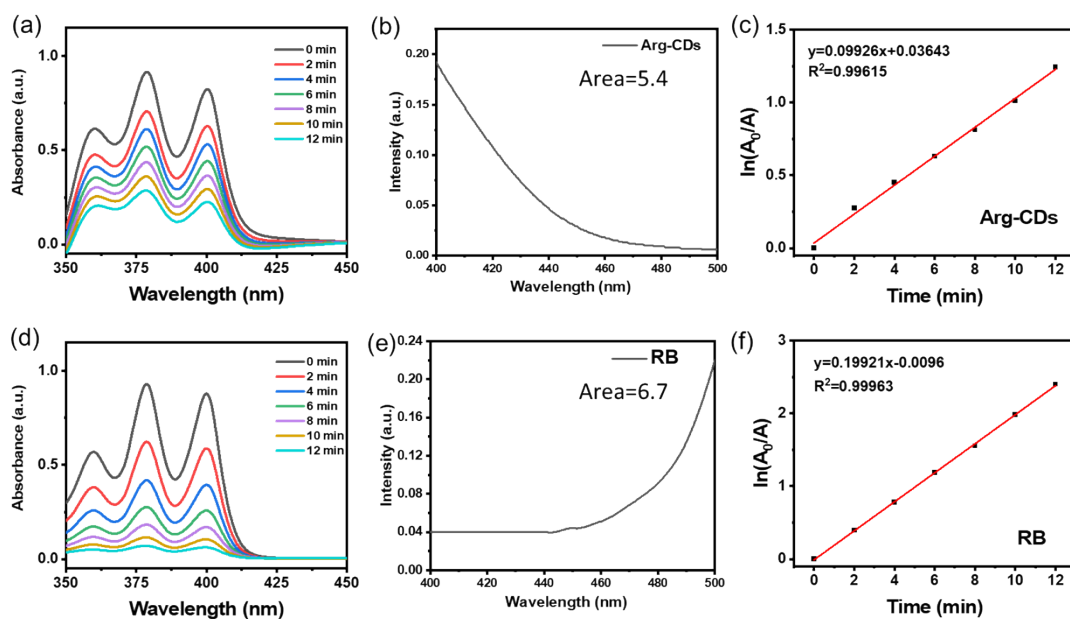

**Fig. S9** Calculations of the  $^1\text{O}_2$  QY of Arg-CDs in  $\text{H}_2\text{O}$ : (a) UV-vis absorption spectra of the ABDA  $^1\text{O}_2$  trap in the presence of Arg-CDs at different irradiation times. (b) The absorption spectrum of Arg-CDs (c) Decomposition rate constants of ABDA by Arg-CDs. (d) UV-vis absorption spectra of ABDA photobleaching by RB at different irradiation times. (e) The absorption spectrum of RB. (f) Decomposition rate constants of ABDA by RB.

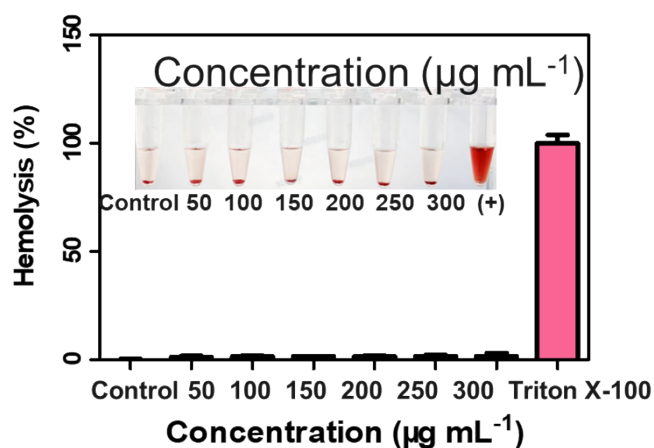

**Fig. S10** Photographs and hematological evaluation of RBCs treated with

different Arg-CDs concentrations, respectively ( $n = 6$ ).

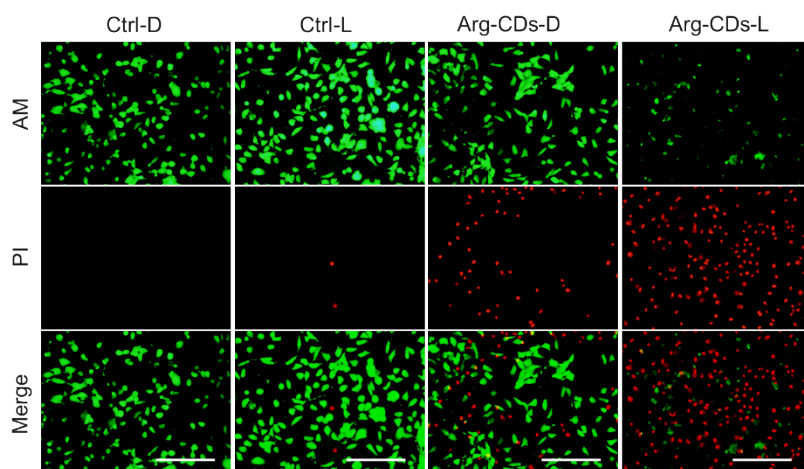

**Fig. S11** Microscopy images of the HepG2 cells labeled with Calcein-AM and PI after incubation with Arg-CDs under dark or LED light irradiation (400-500 nm,  $100 \text{ mW cm}^{-2}$ ) for 12 min, scar bar =  $100 \mu\text{m}$ .

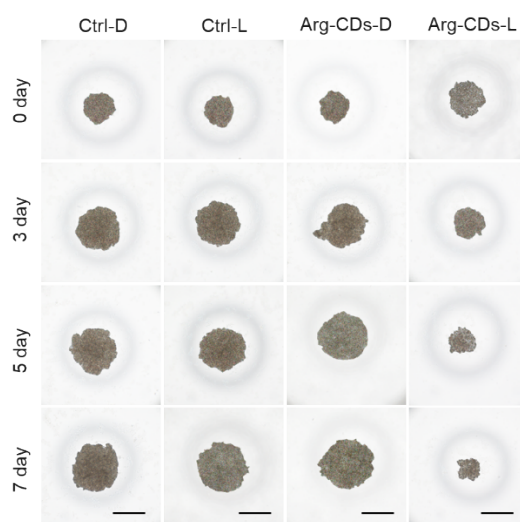

**Fig. S12** Fluorescence microscopy bright-field images of HepG2 3D MCs co-incubated with PBS and Arg-CDs ( $200 \mu\text{g mL}^{-1}$ ) under dark or light irradiation (10 min/day), respectively. These images were captured every day. Scale bar =  $200 \mu\text{m}$ .
